# Supplementary material for: Hierarchical Means Clustering
Source: Springer Nature journal article supplement (doi:10.1007/s00357-022-09419-7), 2022-09-23
Supplement: MOESM1 [file 23529022]

**Journal of Classification manuscript No.**  
(will be inserted by the editor)

---

## **Supplement to “Hierarchical Means Clustering”**

Received: date / Accepted: date

---

**Appendix A Real data examples**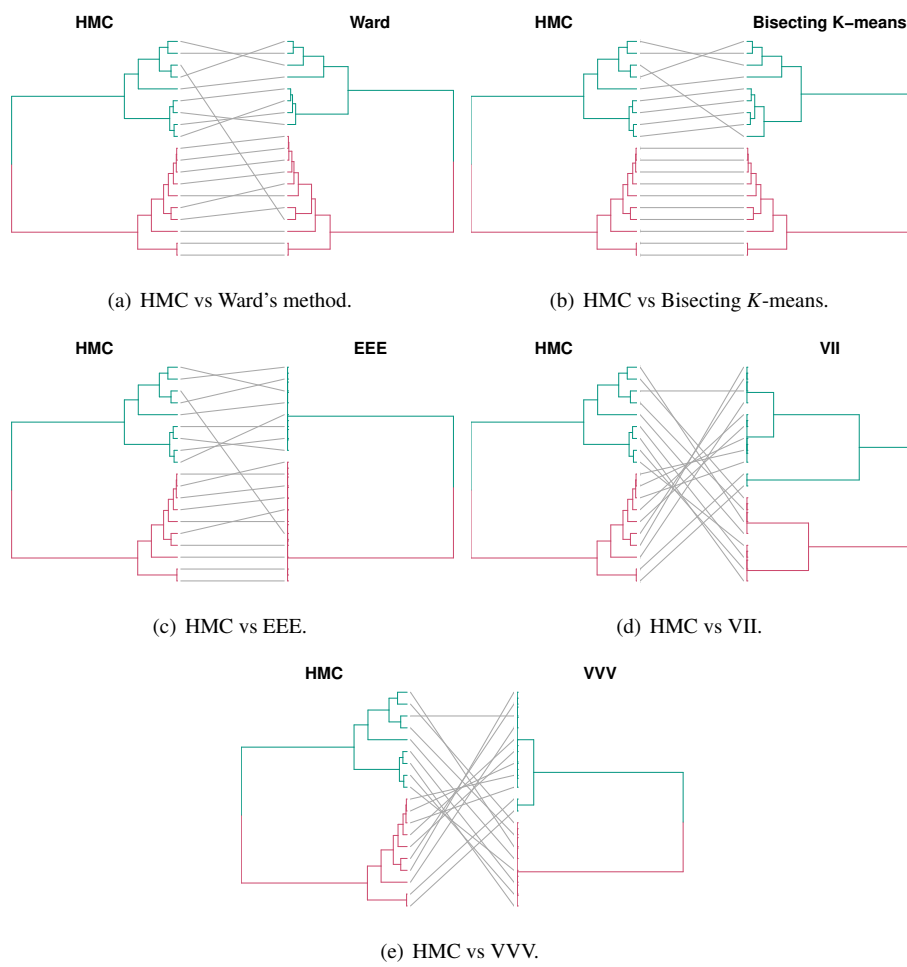

Fig. A.1: Archaeology data: comparison between dendrograms.

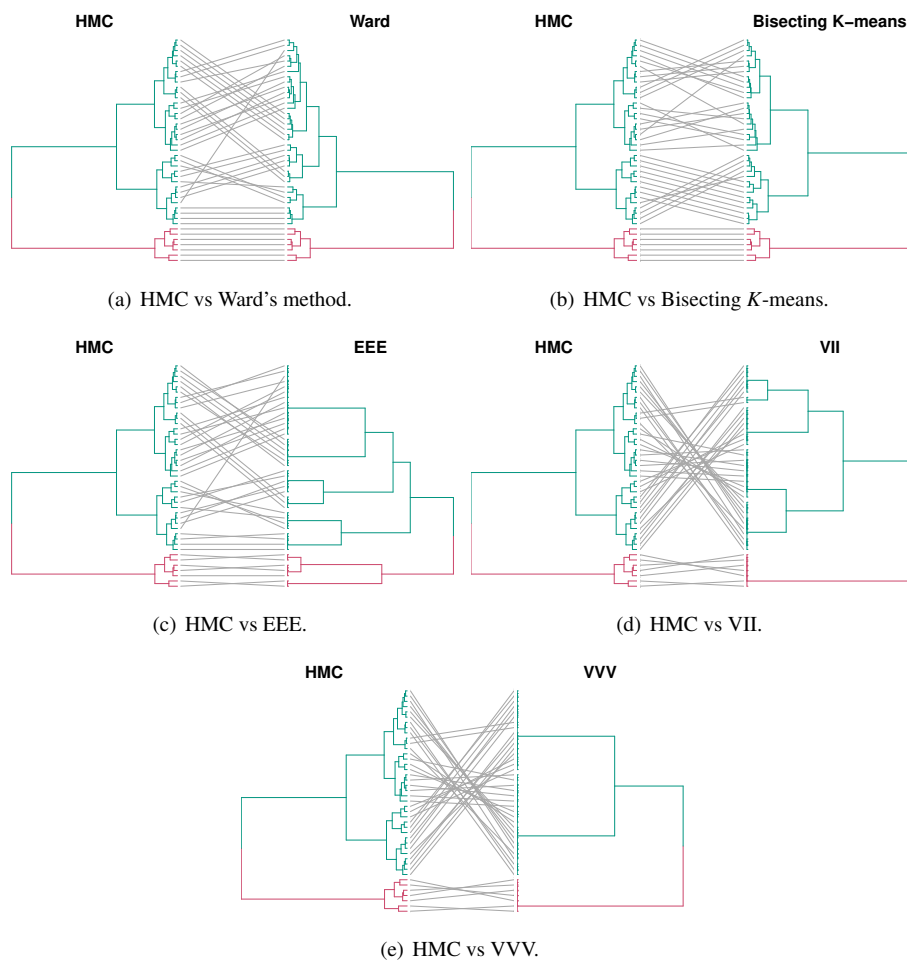

Fig. A.2: Coffee data: comparison between dendrograms.

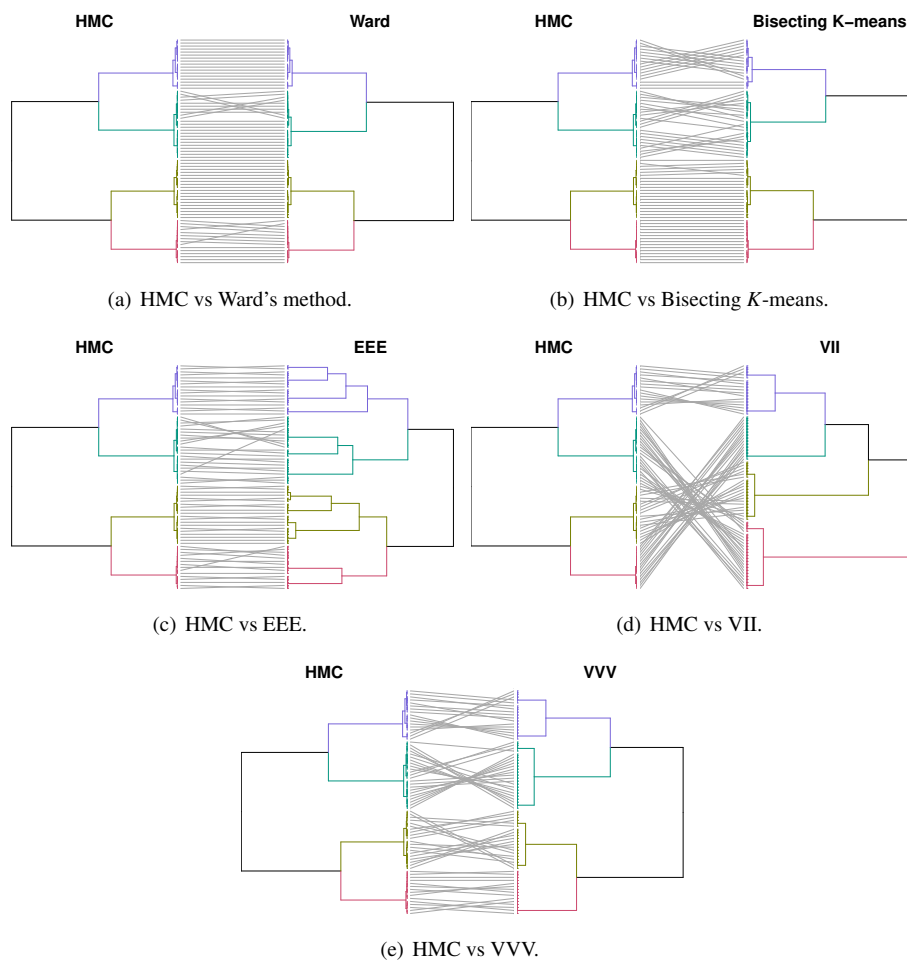

Fig. A.3: Ruspini data: comparison between dendrograms.

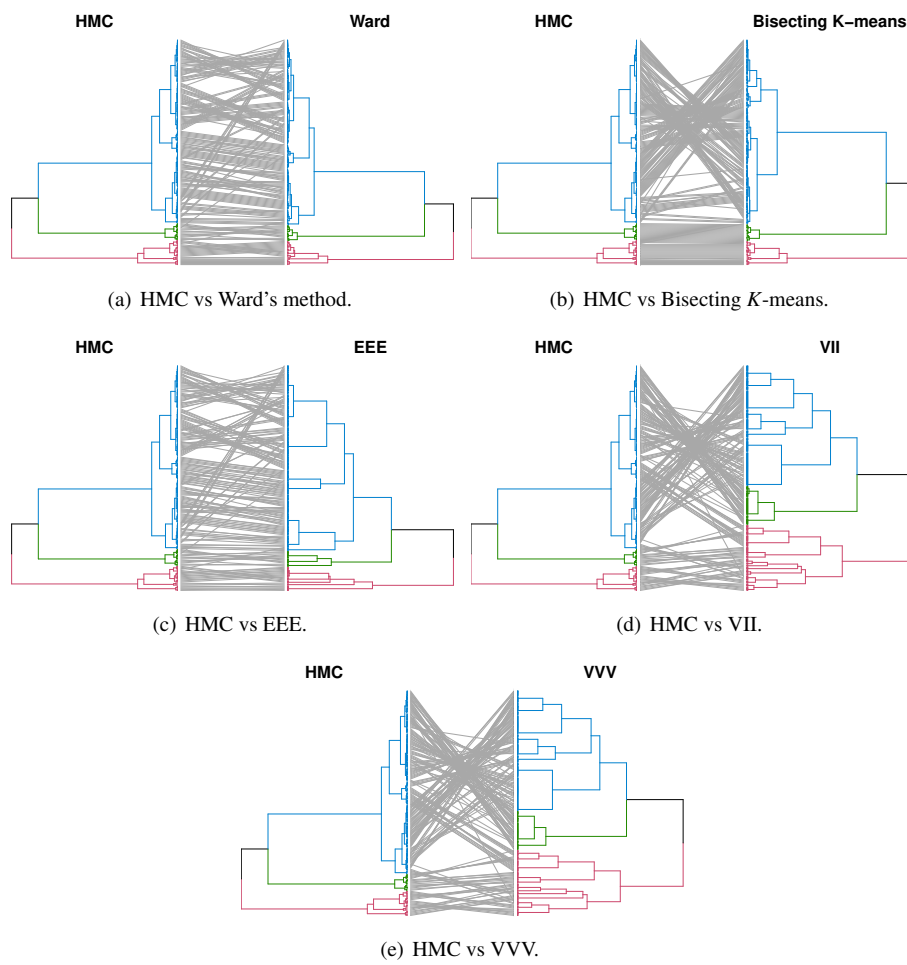

Fig. A.4: Thyroid data: comparison between dendrograms.

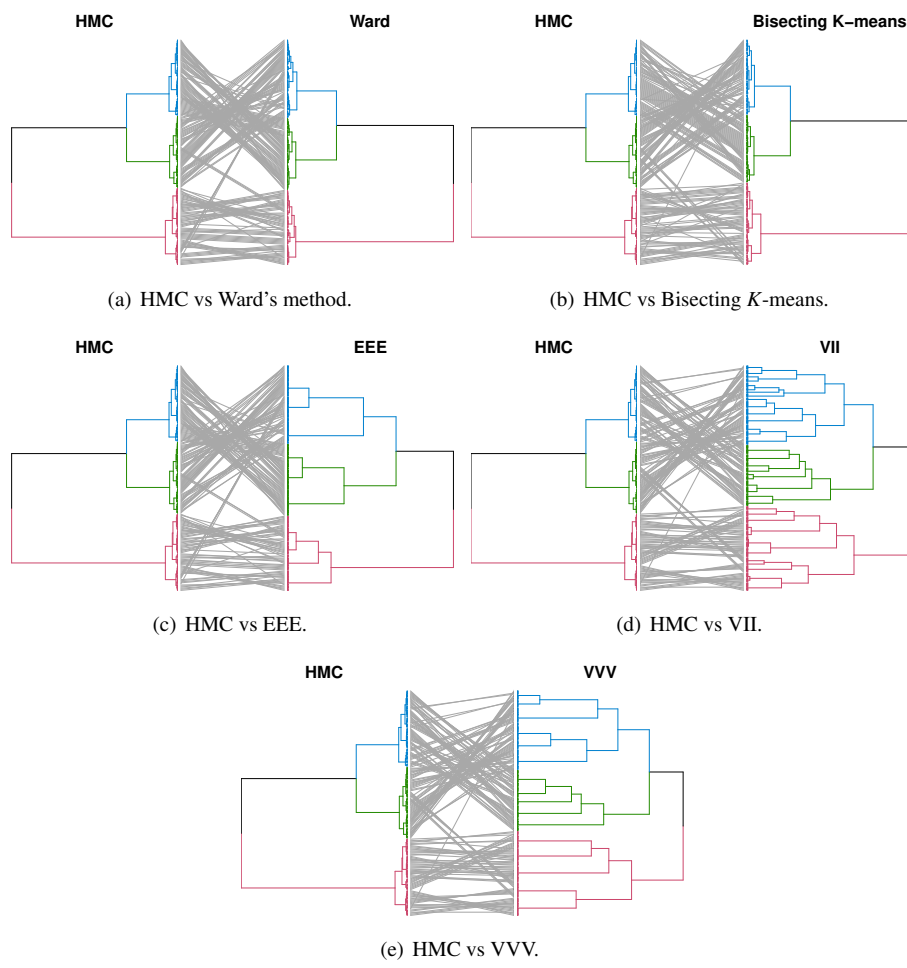

Fig. A.5: Seeds data: comparison between dendrograms.
